# Supplementary material
Source: PubMed Central journal article supplement (PMC10426420)

*Flannigan R, et al. 2023 Canadian Urological Association guideline: Evaluation and management of azoospermia*

**APPENDIX**

**Appendix 1. Needs assessment survey.**

**CUA Guideline on Azoospermia: Needs assessment/semi-structured interview**

CUA Guideline Committee Member: \_\_\_\_\_

Interviewee Demographics:

|                                                                                                 | Interviewee #1 | Interviewee #2 |
|-------------------------------------------------------------------------------------------------|----------------|----------------|
| Practice Location                                                                               |                |                |
| Practice type (acad/comm)                                                                       |                |                |
| Years in practice                                                                               |                |                |
| Do you currently see outpatient consults for Infertility?                                       |                |                |
| Do you perform sperm retrievals?                                                                |                |                |
| Do you perform vasectomy reversals?                                                             |                |                |
| Do you refer your patients with azoospermia to another urologist who specializes in infertility |                |                |
| Do you perform investigations of azoospermic men? If so which do you order?                     |                |                |

***Flannigan R, et al. 2023 Canadian Urological Association guideline: Evaluation and management of azoospermia***

|                                                                                                                                                     |  |  |
|-----------------------------------------------------------------------------------------------------------------------------------------------------|--|--|
| How would you describe your current level of comfort in treating men with azoospermia?<br>(Rate 1-5, with 1=very uncomfortable, 5=very comfortable) |  |  |
|-----------------------------------------------------------------------------------------------------------------------------------------------------|--|--|

Interview Questions:

1. Have you made use of existing clinical practice guidelines on infertility (CUA, AUA, EAU, ASRM etc)? If so, how helpful have these been in guiding your clinical care? Any comments?

Interviewee 1:

Interviewee 2:

2. Within your current scope of practice as it relates to management of azoospermia, what are some topic areas where you would like to have more information and guidance (ie gaps in your knowledge or skills)?

Interviewee 1:

Interviewee 2:

3. What topics would you like to see addressed in the new CUA guideline on azoospermia? (can provide prompts to interviewee with examples such as: role of the urologist in doing the initial lab evaluation etc, how to optimize hormone status, surgical sperm retrieval, surgical reconstruction techniques for vasal or epididymal obstruction, sperm retrieval for men lacking ejaculation and emission)

Interviewee 1:

Interviewee 2:

*Flannigan R, et al. 2023 Canadian Urological Association guideline: Evaluation and management of azoospermia*

4. If the new CUA guideline provided evidence-based recommendations on aspects of azoospermia management that you do NOT currently perform (eg. hormone therapy to optimize non-obstructive azoospermia, surgical sperm retrieval, genetic investigations etc), do you think you would potentially expand the scope of your practice?

Interviewee 1:

Interviewee 2:

5. Any other comments/suggestions?

**Appendix 2.** Summary of judgements for cryopreservation of surgically retrieved sperm.

|                                             | JUDGEMENT                            |                                                      |                                                          |                                         |                         |        |                     |
|---------------------------------------------|--------------------------------------|------------------------------------------------------|----------------------------------------------------------|-----------------------------------------|-------------------------|--------|---------------------|
| DESIRABLE EFFECTS                           | Trivial                              | <b>Small</b>                                         | Moderate                                                 | Large                                   |                         | Varies | Don't know          |
| UNDESIRABLE EFFECTS                         | Large                                | <b>Moderate</b>                                      | Small                                                    | Trivial                                 |                         | Varies | Don't know          |
| CERTAINTY OF EVIDENCE                       | <b>Very low</b>                      | Low                                                  | Moderate                                                 | High                                    |                         |        | No included studies |
| VALUES                                      | Important uncertainty or variability | <b>Possibly important uncertainty or variability</b> | Probably no important uncertainty or variability         | No important uncertainty or variability |                         |        |                     |
| BALANCE OF EFFECTS                          | Favors the comparison                | Probably favors the comparison                       | Does not favor either the intervention or the comparison | <b>Probably favors the intervention</b> | Favors the intervention | Varies | Don't know          |
| RESOURCES REQUIRED                          | <b>Large costs</b>                   | Moderate costs                                       | Negligible costs and savings                             | Moderate savings                        | Large savings           | Varies | Don't know          |
| CERTAINTY OF EVIDENCE OF REQUIRED RESOURCES | Very low                             | Low                                                  | <b>Moderate</b>                                          | High                                    |                         |        | No included studies |
| COST EFFECTIVENESS                          | Favors the comparison                | <b>Probably favors the comparison</b>                | Does not favor either the intervention or the comparison | Probably favors the intervention        | Favors the intervention | Varies | No included studies |
| EQUITY                                      | Reduced                              | <b>Probably reduced</b>                              | Probably no impact                                       | Probably increased                      | Increased               | Varies | Don't know          |
| ACCEPTABILITY                               | No                                   | Probably no                                          | <b>Probably yes</b>                                      | Yes                                     |                         | Varies | Don't know          |
| FEASIBILITY                                 | No                                   | <b>Probably no</b>                                   | Probably yes                                             | Yes                                     |                         | Varies | Don't know          |

\*Note: The intervention in this table is the use of fresh sperm, while the comparison is use of cryopreserved sperm.

# Flannigan R, et al. 2023 Canadian Urological Association guideline: Evaluation and management of azoospermia

## Appendix 3. Summary of findings for cryopreservation of surgically retrieved sperm.

### Summary of findings:

#### Sperm cryopreservation compared to fresh sperm in men with non-obstructive azoospermia

**Patient or population:** men with non-obstructive azoospermia

**Setting:**

**Intervention:** sperm cryopreservation

**Comparison:** fresh sperm

| Outcomes           | Anticipated absolute effects*<br>(95% CI) |                                      | Relative effect<br>(95% CI)      | № of participants<br>(studies)     | Certainty of the evidence<br>(GRADE) | Comments                                                                                                                                                                                                                                                     |
|--------------------|-------------------------------------------|--------------------------------------|----------------------------------|------------------------------------|--------------------------------------|--------------------------------------------------------------------------------------------------------------------------------------------------------------------------------------------------------------------------------------------------------------|
|                    | Risk with fresh sperm                     | Risk with sperm cryopreservation     |                                  |                                    |                                      |                                                                                                                                                                                                                                                              |
| Clinical pregnancy | 383 per 1,000                             | <b>345 per 1,000</b><br>(307 to 387) | <b>RR 0.90</b><br>(0.80 to 1.01) | 2084<br>(22 observational studies) | ⊕○○○<br>Very low <sup>a,b,c</sup>    | The evidence is very uncertain about the effect of sperm cryopreservation on clinical pregnancy. In every 1000 NOA couples who use cryopreserved sperm compared to fresh sperm, 38 fewer (95% CI from 76 fewer to 4 more) couples have clinical pregnancies. |
| Live birth         | 339 per 1,000                             | <b>261 per 1,000</b><br>(227 to 302) | <b>RR 0.77</b><br>(0.67 to 0.89) | 1973<br>(21 observational studies) | ⊕○○○<br>Very low <sup>a,b</sup>      | The evidence is very uncertain about the effect of sperm cryopreservation on live birth. In every 1000 NOA couples who use cryopreserved sperm compared to fresh sperm, 78 fewer (95% CI from 112 fewer to 37 fewer) couples have live birth.                |

\*The risk in the intervention group (and its 95% confidence interval) is based on the assumed risk in the comparison group and the **relative effect** of the intervention (and its 95% CI).

CI: confidence interval; RR: risk ratio

#### GRADE Working Group grades of evidence

**High certainty:** we are very confident that the true effect lies close to that of the estimate of the effect.

**Moderate certainty:** we are moderately confident in the effect estimate: the true effect is likely to be close to the estimate of the effect, but there is a possibility that it is substantially different.

**Low certainty:** our confidence in the effect estimate is limited: the true effect may be substantially different from the estimate of the effect.

**Very low certainty:** we have very little confidence in the effect estimate: the true effect is likely to be substantially different from the estimate of effect.

#### Explanations

a. Studies are at high risk of bias, mainly for a lack of confounder measurement and adjustment.

b. As the individual study results vary considerably with very wide confidence intervals, we decided to rate down by one level for inconsistency and imprecision.

c. Based on the review of the funnel plot, the chances of publication bias are suspected.

*Flannigan R, et al. 2023 Canadian Urological Association guideline: Evaluation and management of azoospermia*

**Appendix 4A. Forest plot of adjuvant cryopreservation on live birth rates.**

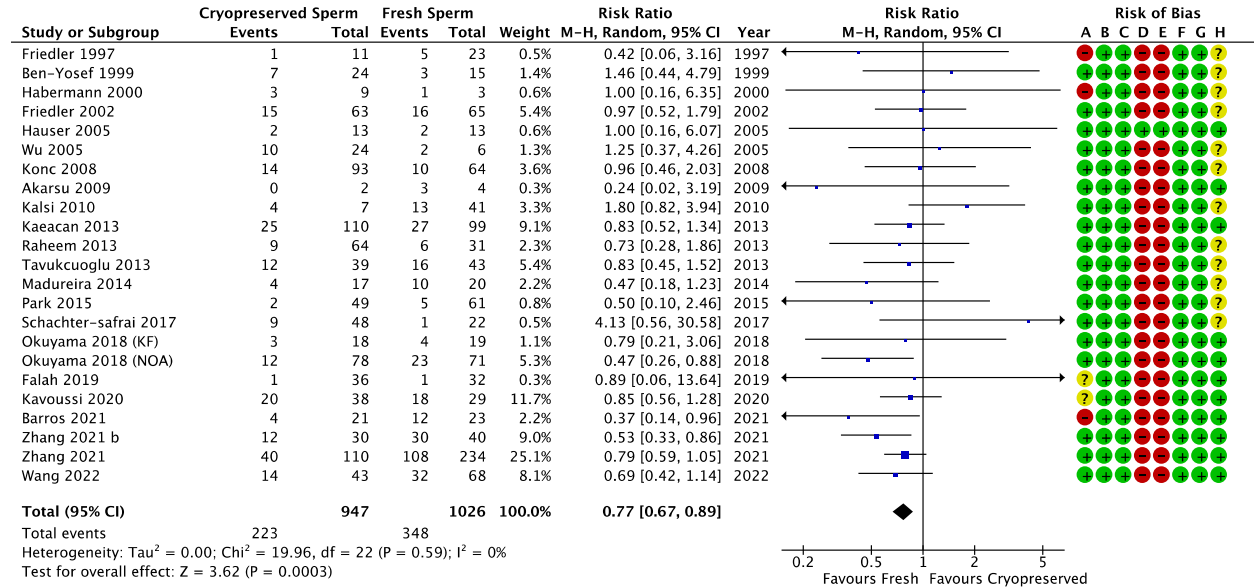

**Risk of bias legend**  
 (A) Selection bias  
 (B) Exposure measurement bias  
 (C) Outcome ascertainment before exposure  
 (D) Confounder adjustment bias  
 (E) Confounder assessment bias  
 (F) Outcome measurement bias  
 (G) Sufficient Follow-up  
 (H) Co-intervention bias

**Appendix 4B. Forest plot demonstrating a sensitivity analysis of adjuvant cryopreservation on live birth rates among studies using an intention-to-treat-like methodology.**

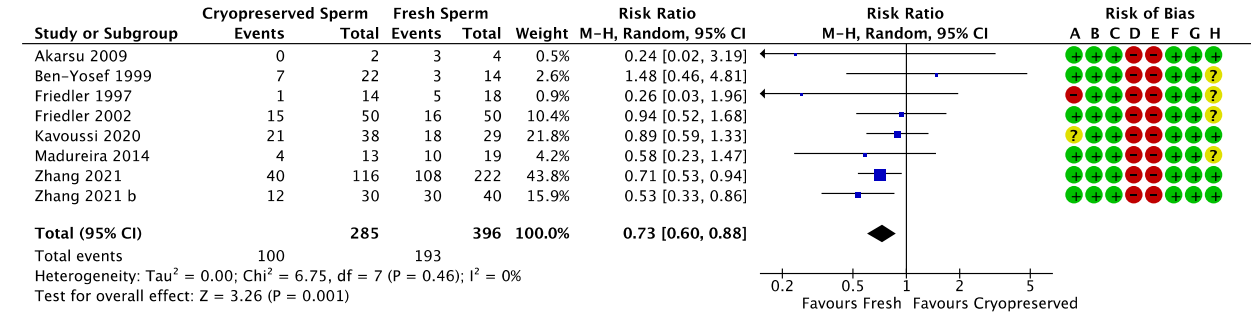

**Risk of bias legend**  
 (A) Selection bias  
 (B) Exposure measurement bias  
 (C) Outcome ascertainment before exposure  
 (D) Confounder adjustment bias  
 (E) Confounder assessment bias  
 (F) Outcome measurement bias  
 (G) Sufficient Follow-up  
 (H) Co-intervention bias

*Flannigan R, et al. 2023 Canadian Urological Association guideline: Evaluation and management of azoospermia*

**Appendix 5A. Forest plot of adjuvant cryopreservation on clinical pregnancy rates.**

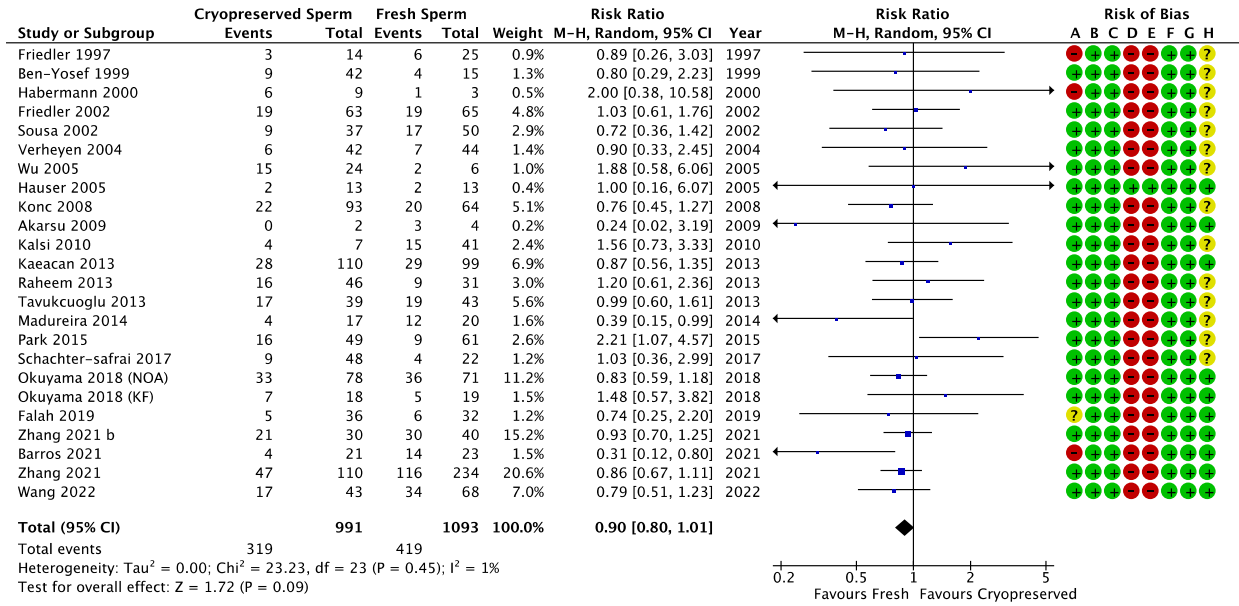

**Risk of bias legend**  
 (A) Selection bias  
 (B) Exposure measurement bias  
 (C) Outcome ascertainment before exposure  
 (D) Confounder adjustment bias  
 (E) Confounder assessment bias  
 (F) Outcome measurement bias  
 (G) Sufficient Follow-up  
 (H) Co-intervention bias

**Appendix 5B. Forest Plot demonstrating a sensitivity analysis of adjuvant cryopreservation on clinical pregnancy rates among studies using an intention-to-treat-like methodology.**

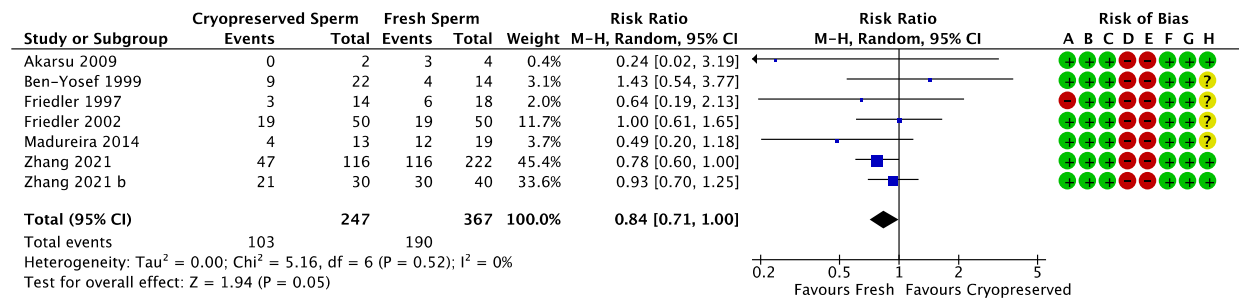

**Risk of bias legend**  
 (A) Selection bias  
 (B) Exposure measurement bias  
 (C) Outcome ascertainment before exposure  
 (D) Confounder adjustment bias  
 (E) Confounder assessment bias  
 (F) Outcome measurement bias  
 (G) Sufficient Follow-up  
 (H) Co-intervention bias

*Flannigan R, et al. 2023 Canadian Urological Association guideline: Evaluation and management of azoospermia*

**Appendix 6.** Summary of judgements for neoadjuvant varicocele repair in NOA.

|                                                    | <b>JUDGEMENT</b>                     |                                                      |                                                          |                                         |                         |        |                     |
|----------------------------------------------------|--------------------------------------|------------------------------------------------------|----------------------------------------------------------|-----------------------------------------|-------------------------|--------|---------------------|
| <b>DESIRABLE EFFECTS</b>                           | <b>Trivial</b>                       | Small                                                | Moderate                                                 | Large                                   |                         | Varies | Don't know          |
| <b>UNDESIRABLE EFFECTS</b>                         | Large                                | Moderate                                             | <b>Small</b>                                             | Trivial                                 |                         | Varies | Don't know          |
| <b>CERTAINTY OF EVIDENCE</b>                       | <b>Very low</b>                      | Low                                                  | Moderate                                                 | High                                    |                         |        | No included studies |
| <b>VALUES</b>                                      | Important uncertainty or variability | <b>Possibly important uncertainty or variability</b> | Probably no important uncertainty or variability         | No important uncertainty or variability |                         |        |                     |
| <b>BALANCE OF EFFECTS</b>                          | Favors the comparison                | <b>Probably favors the comparison</b>                | Does not favor either the intervention or the comparison | Probably favors the intervention        | Favors the intervention | Varies | Don't know          |
| <b>RESOURCES REQUIRED</b>                          | Large costs                          | <b>Moderate costs</b>                                | Negligible costs and savings                             | Moderate savings                        | Large savings           | Varies | Don't know          |
| <b>CERTAINTY OF EVIDENCE OF REQUIRED RESOURCES</b> | <b>Very low</b>                      | Low                                                  | Moderate                                                 | High                                    |                         |        | No included studies |
| <b>COST EFFECTIVENESS</b>                          | Favors the comparison                | <b>Probably favors the comparison</b>                | Does not favor either the intervention or the comparison | Probably favors the intervention        | Favors the intervention | Varies | No included studies |
| <b>EQUITY</b>                                      | Reduced                              | <b>Probably reduced</b>                              | Probably no impact                                       | Probably increased                      | Increased               | Varies | Don't know          |
| <b>ACCEPTABILITY</b>                               | No                                   | Probably no                                          | <b>Probably yes</b>                                      | Yes                                     |                         | Varies | Don't know          |
| <b>FEASIBILITY</b>                                 | No                                   | Probably no                                          | <b>Probably yes</b>                                      | Yes                                     |                         | Varies | Don't know          |

Note: Intervention in this table represents performing a neo-adjuvant varicocele repair in NOA, while the comparison represents observation of the varicocele.

*Flannigan R, et al. 2023 Canadian Urological Association guideline: Evaluation and management of azoospermia*

**Appendix 7. Summary of findings for neoadjuvant varicocele repair in NOA.**

**Summary of findings:**

**Surgical varicocele repair compared to no varicocele repair in men with non-obstructive azoospermia and varicocele**

**Patient or population:** men with non-obstructive azoospermia and varicocele

**Setting:**

**Intervention:** surgical varicocele repair

**Comparison:** no varicocele repair

| Outcomes           | Anticipated absolute effects*<br>(95% CI) |                                      | Relative effect<br>(95% CI)      | No of participants<br>(studies)  | Certainty of the evidence<br>(GRADE) | Comments                                                                                                                                                                                                                          |
|--------------------|-------------------------------------------|--------------------------------------|----------------------------------|----------------------------------|--------------------------------------|-----------------------------------------------------------------------------------------------------------------------------------------------------------------------------------------------------------------------------------|
|                    | Risk with no varicocele repair            | Risk with surgical varicocele repair |                                  |                                  |                                      |                                                                                                                                                                                                                                   |
| Clinical pregnancy | 95 per 1,000                              | <b>167 per 1,000</b><br>(40 to 692)  | <b>RR 1.75</b><br>(0.42 to 7.27) | 87<br>(1 observational study)    | ⊕○○○<br>Very low <sup>a,b</sup>      | The evidence is very uncertain about the effect of surgical varicocele repair on clinical pregnancy. In every 1000 NOA men who undergo varicocele repair, 72 more men (95% CI from 55 fewer to 597 more) have clinical pregnancy. |
| Live birth         | 95 per 1,000                              | <b>136 per 1,000</b><br>(32 to 582)  | <b>RR 1.43</b><br>(0.34 to 6.11) | 87<br>(1 observational study)    | ⊕○○○<br>Very low <sup>a,b</sup>      | The evidence is very uncertain about the effect of surgical varicocele repair on live birth rate. In every 1000 NOA men who undergo varicocele repair, 41 more men (95% CI from 63 fewer to 487 more) have Live birth.            |
| Sperm retrieval    | 514 per 1,000                             | <b>612 per 1,000</b><br>(421 to 889) | <b>RR 1.19</b><br>(0.82 to 1.73) | 260<br>(3 observational studies) | ⊕○○○<br>Very low <sup>c,d</sup>      | The evidence is very uncertain about the effect of surgical varicocele repair on sperm retrieval. In every 1000 NOA men who undergo varicocele repair, 98 more men (95% CI from 93 fewer to 375 more) have sperm retrieval.       |

\*The risk in the intervention group (and its 95% confidence interval) is based on the assumed risk in the comparison group and the **relative effect** of the intervention (and its 95% CI).

CI: confidence interval; RR: risk ratio

**GRADE Working Group grades of evidence**

**High certainty:** we are very confident that the true effect lies close to that of the estimate of the effect.

**Moderate certainty:** we are moderately confident in the effect estimate: the true effect is likely to be close to the estimate of the effect, but there is a possibility that it is substantially different.

**Low certainty:** our confidence in the effect estimate is limited: the true effect may be substantially different from the estimate of the effect.

**Very low certainty:** we have very little confidence in the effect estimate: the true effect is likely to be substantially different from the estimate of effect.

**Explanations**

- a. The only included study is at a high risk of bias.
- b. Extremely few events and wide confidence interval.
- c. None of the included studies is at low risk of bias.
- d. Wide confidence interval with different boundary interpretations.



**Flannigan R, et al. 2023 Canadian Urological Association guideline: Evaluation and management of azoospermia**

**Appendix 8. Forest plot of neoadjuvant varicocele repair on live birth rate.**

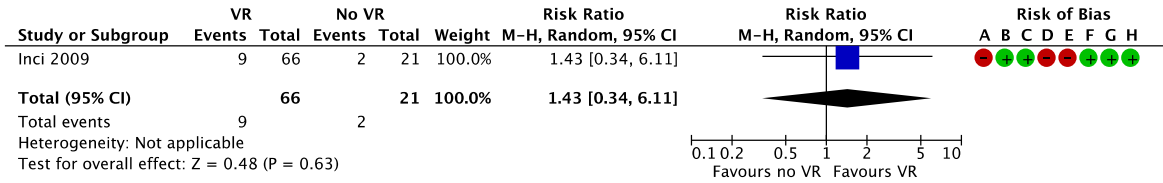

Risk of bias legend

- (A) Selection bias
- (B) Exposure measurement bias
- (C) Outcome ascertainment before exposure
- (D) Confounder adjustment bias
- (E) Confounder assessment bias
- (F) Outcome measurement bias
- (G) Sufficient Follow-up
- (H) Co-intervention bias

**Appendix 9. Forest plot of neoadjuvant varicocele repair on clinical pregnancy rate.**

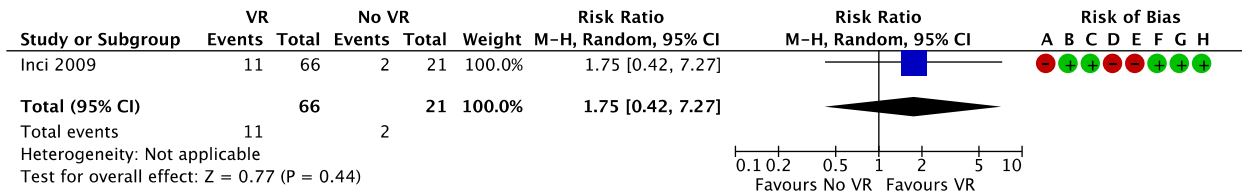

Risk of bias legend

- (A) Selection bias
- (B) Exposure measurement bias
- (C) Outcome ascertainment before exposure
- (D) Confounder adjustment bias
- (E) Confounder assessment bias
- (F) Outcome measurement bias
- (G) Sufficient Follow-up
- (H) Co-intervention bias

**Appendix 10. Forest plot of neoadjuvant varicocele repair on sperm retrieval rate.**

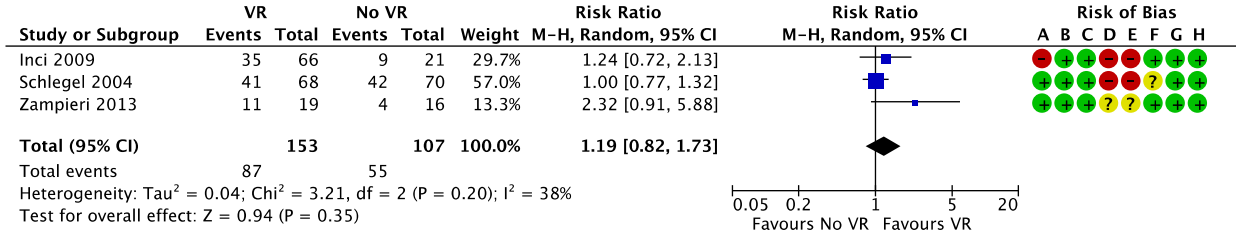

Risk of bias legend

- (A) Selection bias
- (B) Exposure measurement bias
- (C) Outcome ascertainment before exposure
- (D) Confounder adjustment bias
- (E) Confounder assessment bias
- (F) Outcome measurement bias
- (G) Sufficient Follow-up
- (H) Co-intervention bias

*Flannigan R, et al. 2023 Canadian Urological Association guideline: Evaluation and management of azoospermia*

**Appendix 11. Summary of judgements for neoadjuvant hormone therapy in NOA.**

|                                             | JUDGEMENT                            |                                               |                                                          |                                         |                         |        |                     |
|---------------------------------------------|--------------------------------------|-----------------------------------------------|----------------------------------------------------------|-----------------------------------------|-------------------------|--------|---------------------|
| DESIRABLE EFFECTS                           | Trivial                              | Small                                         | Moderate                                                 | Large                                   |                         | Varies | Don't know          |
| UNDESIRABLE EFFECTS                         | Large                                | Moderate                                      | Small                                                    | Trivial                                 |                         | Varies | Don't know          |
| CERTAINTY OF EVIDENCE                       | Very low                             | Low                                           | Moderate                                                 | High                                    |                         |        | No included studies |
| VALUES                                      | Important uncertainty or variability | Possibly important uncertainty or variability | Probably no important uncertainty or variability         | No important uncertainty or variability |                         |        |                     |
| BALANCE OF EFFECTS                          | Favors the comparison                | Probably favors the comparison                | Does not favor either the intervention or the comparison | Probably favors the intervention        | Favors the intervention | Varies | Don't know          |
| RESOURCES REQUIRED                          | Large costs                          | Moderate costs                                | Negligible costs and savings                             | Moderate savings                        | Large savings           | Varies | Don't know          |
| CERTAINTY OF EVIDENCE OF REQUIRED RESOURCES | Very low                             | Low                                           | Moderate                                                 | High                                    |                         |        | No included studies |
| COST EFFECTIVENESS                          | Favors the comparison                | Probably favors the comparison                | Does not favor either the intervention or the comparison | Probably favors the intervention        | Favors the intervention | Varies | No included studies |
| EQUITY                                      | Reduced                              | Probably reduced                              | Probably no impact                                       | Probably increased                      | Increased               | Varies | Don't know          |
| ACCEPTABILITY                               | No                                   | Probably no                                   | Probably yes                                             | Yes                                     |                         | Varies | Don't know          |
| FEASIBILITY                                 | No                                   | Probably no                                   | Probably yes                                             | Yes                                     |                         | Varies | Don't know          |

Note: Intervention in this table represents use of neo-adjuvant hormone therapy in NOA, where the comparison represents no treatment with respect to hormone therapy for the purpose of improving semen analysis parameters alone.

*Flannigan R, et al. 2023 Canadian Urological Association guideline: Evaluation and management of azoospermia*

**Appendix 12.** Summary of findings for neoadjuvant hormone therapy in NOA.

**Summary of findings:**

**Hormonal treatment compared to no hormonal treatment in men with non-obstructive azoospermia**

**Patient or population:** men with non-obstructive azoospermia

**Setting:**

**Intervention:** hormonal treatment

**Comparison:** no hormonal treatment

| Outcomes           | Anticipated absolute effects*<br>(95% CI) |                                      | Relative effect<br>(95% CI)      | № of participants<br>(studies)           | Certainty of<br>the evidence<br>(GRADE) | Comments                                                                                                                                                                                                                                                                                                                                                                        |
|--------------------|-------------------------------------------|--------------------------------------|----------------------------------|------------------------------------------|-----------------------------------------|---------------------------------------------------------------------------------------------------------------------------------------------------------------------------------------------------------------------------------------------------------------------------------------------------------------------------------------------------------------------------------|
|                    | Risk with no<br>hormonal<br>treatment     | Risk with<br>hormonal<br>treatment   |                                  |                                          |                                         |                                                                                                                                                                                                                                                                                                                                                                                 |
| Clinical pregnancy | 224 per 1,000                             | <b>211 per 1,000</b><br>(128 to 343) | <b>RR 0.94</b><br>(0.57 to 1.53) | 582<br>(3 observational<br>studies)      | ⊕○○○<br>Very low <sup>a,b,c</sup>       | The evidence is very uncertain about the effect of hormonal treatment on clinical pregnancy. In the two observational studies that used hCG, FSH, a mixed approach to improve male infertility through hormonal treatments, 13 fewer couples (95% CI from 96 fewer to 119 more) had a clinical pregnancy in every 1000 men who received the treatment compared to no treatment. |
| Live birth rate    | 257 per 1,000                             | <b>193 per 1,000</b><br>(134 to 278) | <b>RR 0.75</b><br>(0.52 to 1.08) | 615<br>(3 observational<br>studies)      | ⊕○○○<br>Very low <sup>a,c</sup>         | The evidence is very uncertain about the effect of hormonal treatment on the live birth rate. In every 1000 NOA men who received hormonal treatment compared to no treatment, 64 fewer couples (95% CI from 123 fewer to 21 more) had a live birth.                                                                                                                             |
| Sperm retrieval    | 362 per 1,000                             | <b>506 per 1,000</b><br>(365 to 698) | <b>RR 1.40</b><br>(1.01 to 1.93) | 1540<br>(11<br>observational<br>studies) | ⊕○○○<br>Very low <sup>a,c,d</sup>       | The evidence is very uncertain about the effect of hormonal treatment on sperm retrieval rate. In every 1000 NOA men who received hormonal treatment compared to no treatment, 144 more men (95% CI from 3 more to 336 more) had sperm retrieval.                                                                                                                               |

\*The risk in the intervention group (and its 95% confidence interval) is based on the assumed risk in the comparison group and the **relative effect** of the intervention (and its 95% CI).

CI: confidence interval; RR: risk ratio

**GRADE Working Group grades of evidence**

**High certainty:** we are very confident that the true effect lies close to that of the estimate of the effect.

**Moderate certainty:** we are moderately confident in the effect estimate: the true effect is likely to be close to the estimate of the effect, but there is a possibility that it is substantially different.

**Low certainty:** our confidence in the effect estimate is limited: the true effect may be substantially different from the estimate of the effect.

**Very low certainty:** we have very little confidence in the effect estimate: the true effect is likely to be substantially different from the estimate of effect.

**Explanations**

- a. The studies included in the analysis are at high risk of bias especially because of lack of confounder measurement and adjustment.
- b. Results of the study using FSH was considerably different from the other subgroups
- c. The confidence interval of the absolute effect crosses the line of no impact and the boundaries fall into different interpretation zones.
- d. Visual inspection of the confidence intervals demonstrates heterogeneity.

*Flannigan R, et al. 2023 Canadian Urological Association guideline: Evaluation and management of azoospermia*

**Appendix 13. Forest plot of neoadjuvant hormone therapy on live birth rates.**

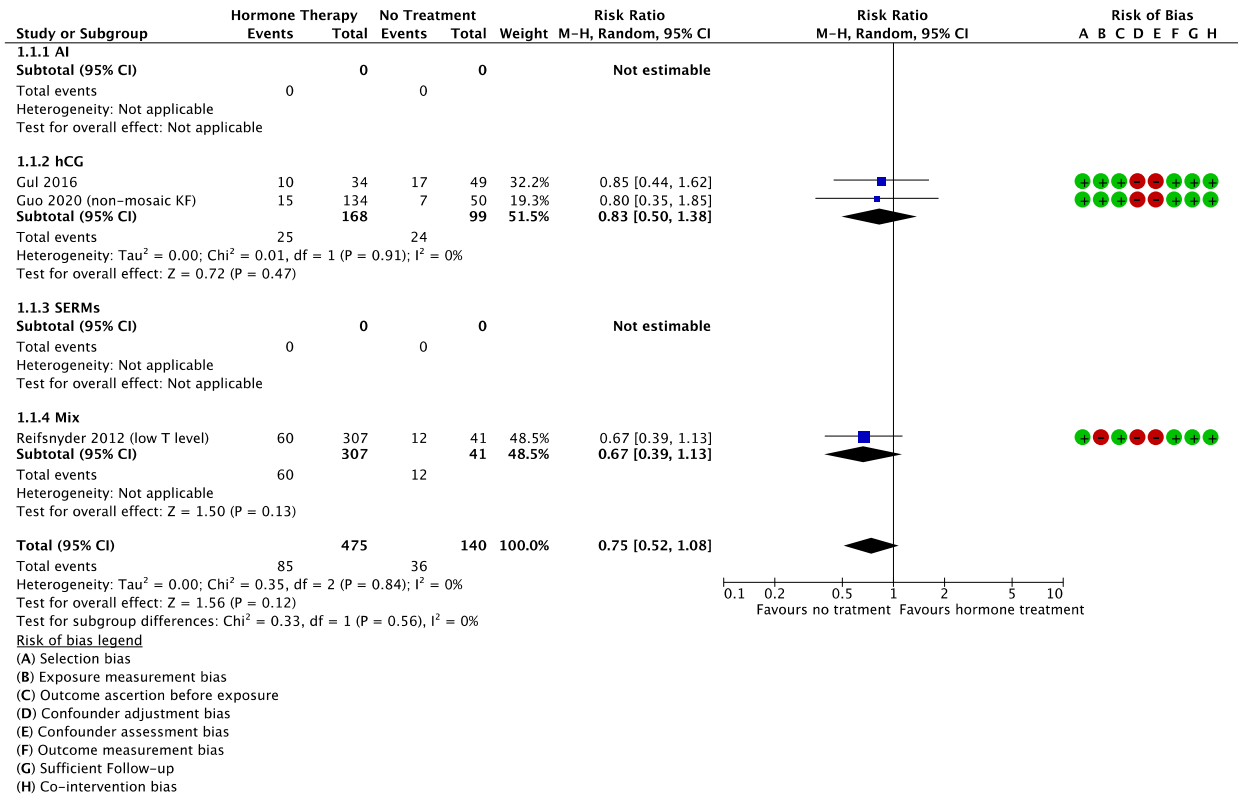

*Flannigan R, et al. 2023 Canadian Urological Association guideline: Evaluation and management of azoospermia*

**Appendix 14.** Forest plot of neoadjuvant hormone therapy on clinical pregnancy rates.

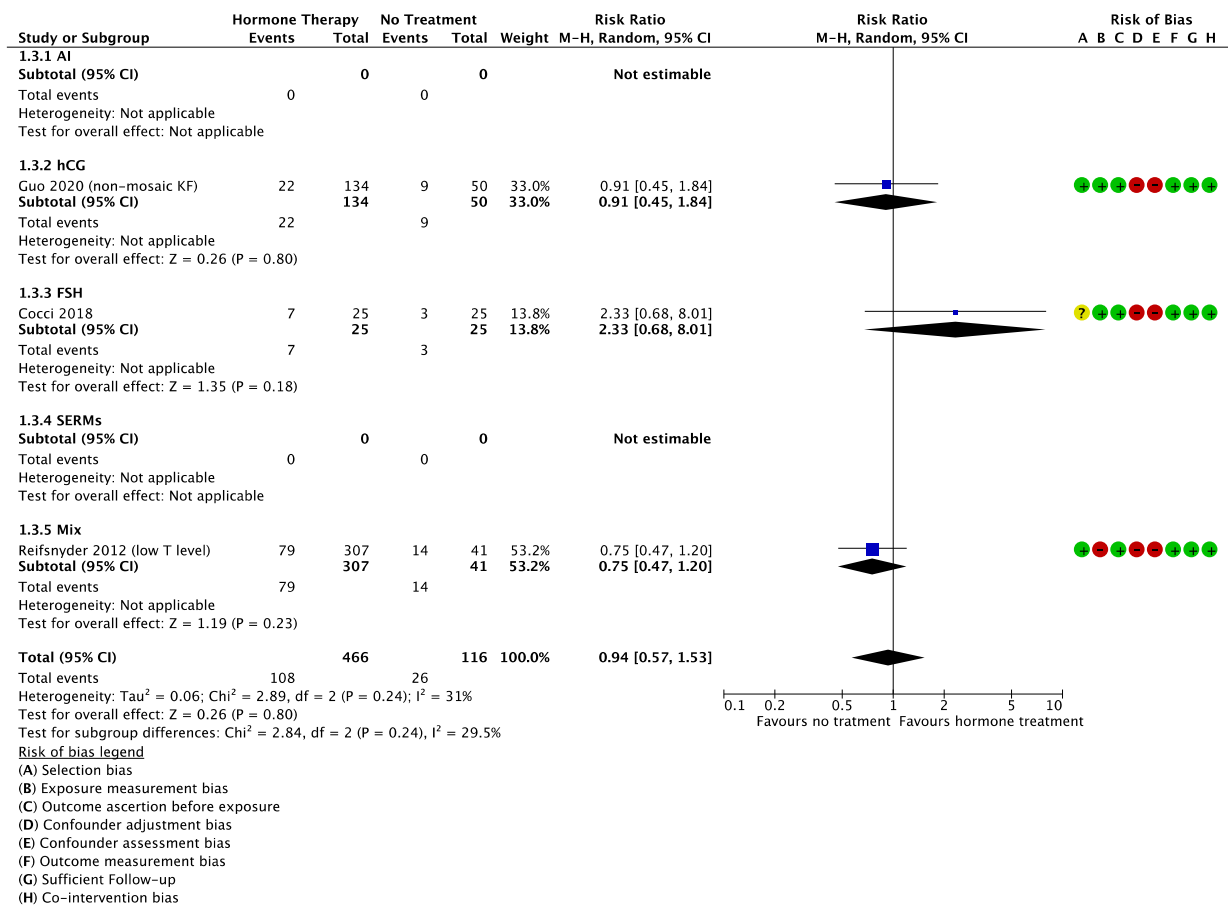

*Flannigan R, et al. 2023 Canadian Urological Association guideline: Evaluation and management of azoospermia*

**Appendix 15.** Forest plot of neoadjuvant hormone therapy on sperm retrieval rates.

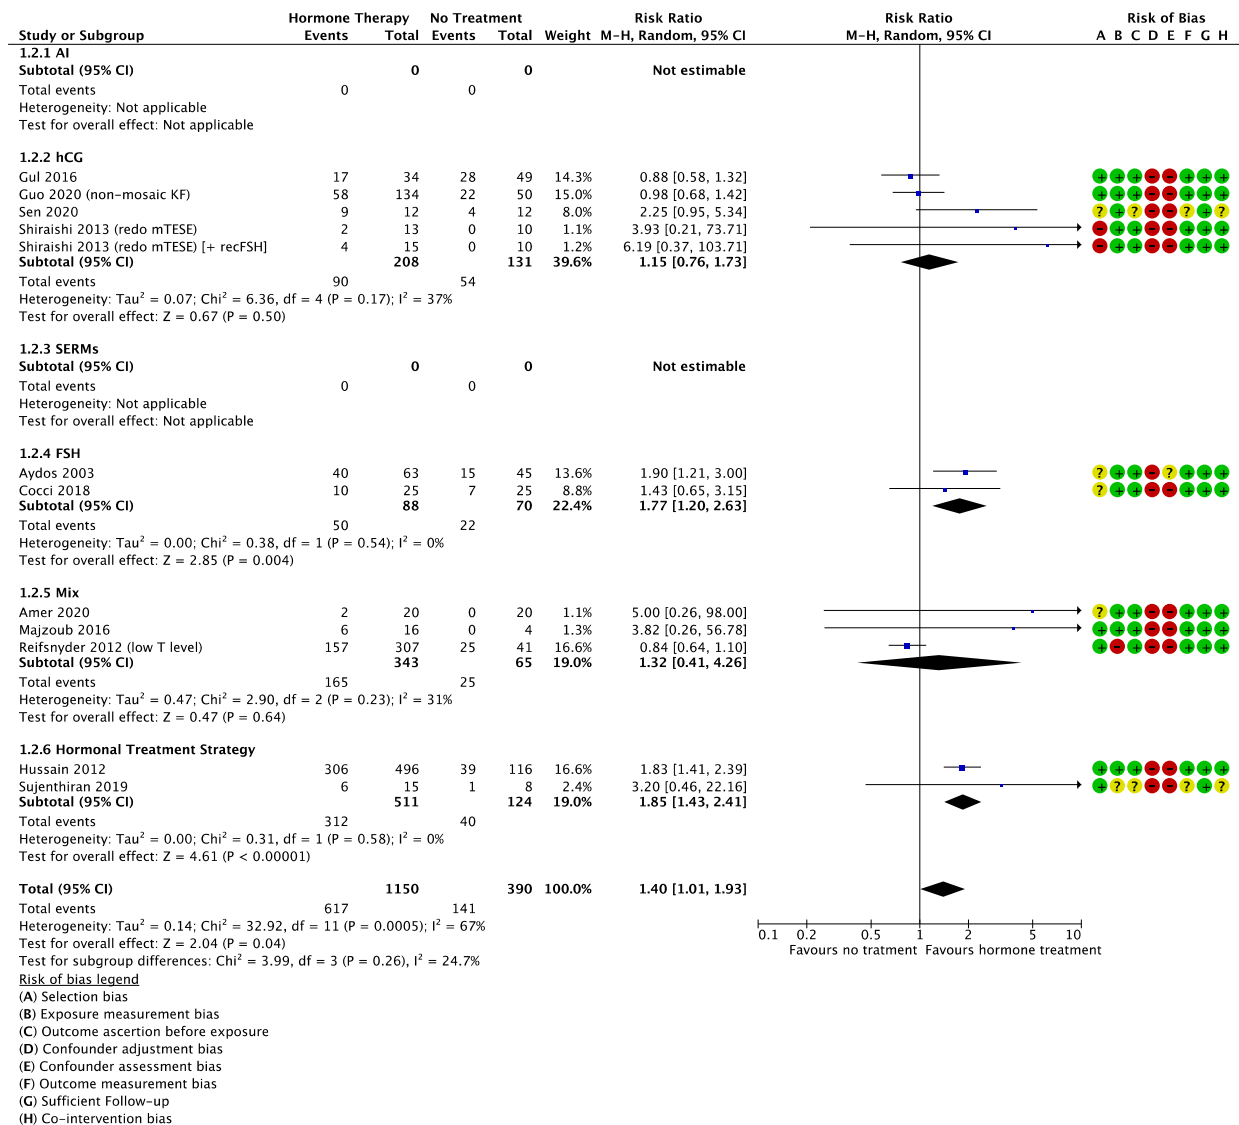

Supplement: 8445_Appendix.pdf [file 8445_Appendix.pdf]
